# Supplementary material for: From abstract to impact in cardiovascular research: factors predicting publication and citation
Source: PubMed Central journal article supplement — Eur Heart J. 2012 Jun 5;33(24):3034–45. doi: 10.1093/eurheartj/ehs113 (PMC3530902; doi:10.1093/eurheartj/ehs113), 2012-06-05
Supplement: supp_ehs113_ehs113suppl.pdf [file supp_ehs113_ehs113suppl.pdf]

## From Abstract to Impact in Cardiovascular Research – Factors Predicting Publication and Citation

### Supplemental Online Material

Stephan Winnik<sup>1,2</sup>, Dimitri A. Raptis<sup>3</sup>, Janina H. Walker<sup>4</sup>, Matthias Hasun<sup>1</sup>,  
Thimotheus Speer<sup>2</sup>, Pierre-Alain Clavier<sup>3,11</sup>, Michel Komajda<sup>5</sup>, Jeroen J. Bax<sup>6</sup>, Michal  
Tendera<sup>7</sup>, Kim Fox<sup>8</sup>, Frans Van de Werf<sup>9</sup>, Ciara Mundow<sup>10</sup>, Thomas F. Lüscher<sup>1,2,11</sup>,  
Frank Ruschitzka<sup>2</sup> and Christian M. Matter<sup>1,2,11</sup>

- 1) *Division of Cardiology, Department of Medicine, University Hospital Zurich, Rämistr. 100, CH-8091 Zurich, Switzerland*
- 2) *Cardiovascular Research, Institute of Physiology, University of Zurich, Winterthurerstr. 190, CH-8057 Zurich, Switzerland*
- 3) *Department of Surgery, University Hospital Zurich, Rämistr. 100, CH-8091 Zurich, Switzerland*
- 4) *Department of Pediatrics, Cantonal Hospital Muensterlingen, CH-8596 Muensterlingen, Switzerland*
- 5) *University Pierre et Marie Curie Paris 6, Pitie Salpetriere Hospital, Department of Cardiology, 47 Boulevard de l'Hopital, 75013 Paris, France*
- 6) *Department of Cardiology, Leiden University Medical Center, Albinusdreef 2, 2333 ZA Leiden, The Netherlands*
- 7) *3<sup>rd</sup> Division of Cardiology, Medical University of Silesia, Poniatowskiego 15, 40-055 Katowice, Poland*
- 8) *National Heart and Lung Institute, Imperial College, ICMS Royal Brompton Hospital, Sydney Street, London SW3 6NP, United Kingdom*
- 9) *Department of Cardiology, University Hospital Gasthuisberg, Herestraat 49, 3000 Leuven, Belgium*
- 10) *Department of Scientific Programme Management, European Society of Cardiology, 2035 Route des Colles – Les Templiers, Sofia Antipolis, France*
- 11) *Zurich Center for Integrative Human Physiology, University of Zurich, Zurich, Switzerland*

Running title: Output and Quality in Cardiovascular Science

Key words: *Scientific quality; predictors; gender; economy*

#### **Correspondence**

Stephan Winnik, M.D.

Division of Cardiology, Department of Medicine, University Hospital Zurich, and  
Cardiovascular Research, Institute of Physiology, University of Zurich, Zurich, Switzerland

Winterthurerstr. 190, CH-8057 Zurich, Switzerland

Fax: +41 44 635 68 27; phone: +41 44 635 50 97

Email: Stephan.Winnik@access.uzh.ch

## **Supplemental Methods**

### **Identification of Author Gender**

Surnames and first names of the submitting authors as well as the home institution of all authors were known for all abstracts. Gender identification was performed according to the following algorithm: For authors originating from German speaking countries (respective home institution in Germany, Austria or Switzerland) the gender was identified by the use of common first names, such as “Sebastian” or “Tobias” in men, and “Sabine” or “Christine” in women. Genders of authors originating from French speaking countries (France, Canada, Switzerland) were as well identified by their use of common first names, with e.g. “Jacques” being male and “Valérie” being female. Genders of authors originating from English speaking countries (United Kingdom, Ireland, United States of America, Australia, New Zealand, Canada) with common first names, such as “Jonathan” (male) or “Lisa” (female), were also identified by their first names using a similar approach. Genders of authors originating from Italy were as well identified by their first names with all first names ending on “o” such as “Francesco” assumed to be men and others such as “Adriana” or “Simona” assumed to be women. For Greek and Slovak authors, gender was identified by the respective surnames with all surnames ending on “s”, such as “Papagiannis” or “Krasadakis”, assumed to be men and others, such as “Papadopoulou” or “Avgerinou”, assumed to be women. Genders of Czech and Slovak authors were also identified by their surnames with all surnames ending on “-ová” assumed to be women, such as “Lenková” or “Sotniková”, and others like “Kuchar” or “Stasiák” assumed to be men. For all other authors, and those with uncommon first- or surnames, a photograph from their home institution was assessed through google images using their first name and surname together with their home institution as search terms. If no image from the home institution was available, other online sources for images clearly identifying the respective author by first name and surname in the respective city and country were sought. If no gender could be identified within 15 minutes the gender was marked as unknown. After completion of data collection, gender identification was double-checked by Eirini Liova, a language expert and proficient speaker of Greek, Russian, Romanian and English.

**Figure S1**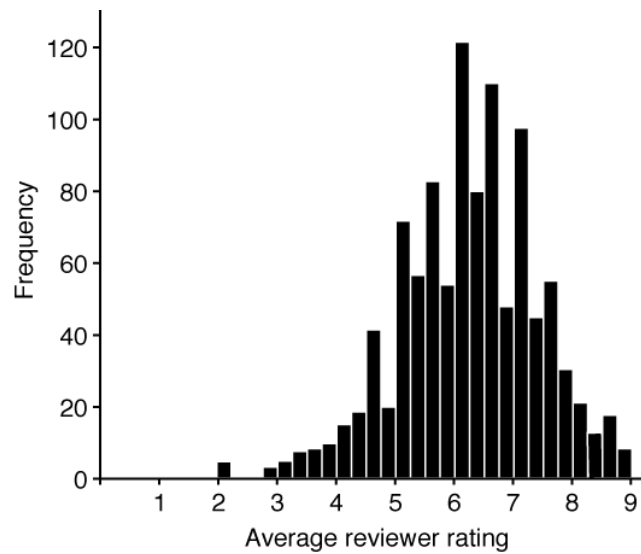

**The peer review process of the ESC Congress 2006:** All abstracts submitted were peer-reviewed in a blinded fashion by three to eight expert reviewers, and graded on a scale from one to ten. The frequencies of the average reviewer rating showed a central tendency. Ratings were not normally distributed.

Table S1: Prediction of oral presentation among accepted studies

| <b>Parameters</b>                                                                        | <b>Poster presentation rate [% accepted (n)]</b> | <b>Oral presentation rate [% accepted (n)]</b> | <b>Univariate reg. OR, 95% CI (p)</b> | <b>Multivariate reg. OR, 95% CI (p)</b> |
|------------------------------------------------------------------------------------------|--------------------------------------------------|------------------------------------------------|---------------------------------------|-----------------------------------------|
| <b>Type of research</b>                                                                  |                                                  |                                                |                                       |                                         |
| <i>Clinical</i>                                                                          | 81.6 (270)                                       | 18.4 (61)                                      | <i>ref.</i>                           |                                         |
| <i>Basic</i>                                                                             | 71.1 (32)                                        | 28.9 (13)                                      | 0.56, 0.28-1.12 (0.101)               | n.i.                                    |
| <b>Type of institution</b>                                                               |                                                  |                                                |                                       |                                         |
| <i>Not university-affiliated</i>                                                         | 74.6 (50)                                        | 25.4 (17)                                      | <i>ref.</i>                           |                                         |
| <i>University-affiliated</i>                                                             | 81.6 (252)                                       | 18.4 (57)                                      | 0.67, 0.36-1.24 (0.198)               | n.i.                                    |
| <b>Study design (clinical)</b>                                                           |                                                  |                                                |                                       |                                         |
|                                                                                          |                                                  |                                                | (0.673)                               |                                         |
| <i>Retrospective</i>                                                                     | 81.3 (130)                                       | 18.8 (30)                                      | <i>ref.</i>                           |                                         |
| <i>Prospective non-RCT</i>                                                               | 82.3 (102)                                       | 17.7 (22)                                      | 1.04, 0.39-2.76 (0.937)               | n.i.                                    |
| <i>RCT</i>                                                                               | 80.6 (25)                                        | 19.4 (6)                                       | 0.94, 0.51-1.72 (0.828)               | n.i.                                    |
| <i>Meta-Analysis</i>                                                                     | 66.7 (2)                                         | 33.3 (1)                                       | 2.17, 0.19-24.69 (0.533)              | n.i.                                    |
| <i>Systematic Review</i>                                                                 | -                                                | -                                              | -                                     | -                                       |
| <i>Other</i>                                                                             | 84.6 (11)                                        | 15.4 (2)                                       | 1.44, 0.28-7.51 (0.662)               | n.i.                                    |
| <b>Number of patients (clinical) *</b>                                                   |                                                  |                                                |                                       |                                         |
| <100                                                                                     | 83.3 (110)                                       | 16.7 (22)                                      | <i>ref.</i>                           |                                         |
| ≥100                                                                                     | 79.6 (152)                                       | 20.4 (39)                                      | 1.28, 0.72-2.29 8 (0.398)             | n.i.                                    |
| <b>Study field (clinical)</b>                                                            |                                                  |                                                |                                       |                                         |
|                                                                                          |                                                  |                                                | (0.333)                               |                                         |
| <i>Cardiac imaging, computational, acute cardiac care</i>                                | 84.8 (39)                                        | 15.2 (7)                                       | <i>ref.</i>                           |                                         |
| <i>Rhythmology</i>                                                                       | 70.0 (28)                                        | 30.0 (12)                                      | 1.91, 0.73-5.04 (0.191)               | n.i.                                    |
| <i>Heart failure, left ventricular function, valvular disease, pulmonary circulation</i> | 82.1 (46)                                        | 17.9 (10)                                      | 1.14, 0.44-2.97 (0.791)               | n.i.                                    |
| <i>Coronary artery disease, ischemia</i>                                                 | 81.0 (34)                                        | 19.0 (8)                                       | 0.87, 0.31-2.47 (0.790)               | n.i.                                    |
| <i>Interventional cardiology, peripheral circulation, stroke</i>                         | 81.1 (30)                                        | 18.9 (7)                                       | 1.52, 0.55-4.20 (0.420)               | n.i.                                    |
| <i>Exercise, prevention, epidemiology, pharmacology, nursing</i>                         | 86.8 (46)                                        | 13.2 (7)                                       | 0.68, 0.23-1.98 (0.479)               | n.i.                                    |
| <i>Hypertension, myocardial and pericardial disease, cardiovasc. surgery</i>             | 75.7 (28)                                        | 24.3 (9)                                       | 1.62, 0.60-4.38 (0.345)               | n.i.                                    |
| <i>Other</i>                                                                             | 95.0 (19)                                        | 5.0 (1)                                        | n.a.                                  | -                                       |
| <b>Gender first author †</b>                                                             |                                                  |                                                |                                       |                                         |
| <i>Male</i>                                                                              | 82.3 (237)                                       | 17.7 (51)                                      | <i>ref.</i>                           |                                         |
| <i>Female</i>                                                                            | 73.9 (65)                                        | 26.1 (23)                                      | 1.64, 0.94-2.89 (0.084)               | n.i.                                    |
| <b>Gender last author ‡</b>                                                              |                                                  |                                                |                                       |                                         |
| <i>Male</i>                                                                              | 79.8 (257)                                       | 20.2 (65)                                      | <i>ref.</i>                           |                                         |
| <i>Female</i>                                                                            | 84.3 (43)                                        | 15.7 (8)                                       | 0.74, 0.33-1.64 (0.453)               | n.i.                                    |

OR=odds ratio, CI=confidence interval, RCT=randomized controlled trial, *ref.*=reference variable for odds ratio calculation, Analyses performed on representative 10% selection (n=1002), margin of error<0.01.

\* In 46 clinical studies no information on the number of patients was provided.

† In 18 studies no gender for the first author could be identified.

‡ In 29 studies no gender for the last author could be identified.

n.i. = variable not included in final step of regression model (backward conditional variable exclusion), no significant association. Backward conditional variable exclusion, c-statistic=0.570.

**Table S2: Overall output of studies submitted to the ESC 2006**

| <i>Parameters</i>  | <b>total citations</b> | <b>2-year citations</b> | <b>Impact factor</b> |
|--------------------|------------------------|-------------------------|----------------------|
| <b>Mean</b>        | 11.0                   | 6.0                     | 4.3                  |
| <b>Sum</b>         | 3216                   | 1754                    | 1264.3               |
| <b>Percentiles</b> |                        |                         |                      |
| 25                 | 0.0                    | 0.0                     | 1.6                  |
| 50                 | 3.0                    | 2.0                     | 3.1                  |
| 75                 | 10.0                   | 6.0                     | 5.4                  |
| 80                 | 13.0                   | 7.0                     | 6.0                  |
| 85                 | 20.0                   | 9.0                     | 7.6                  |
| 90                 | 22.6                   | 12.0                    | 9.8                  |
| 95                 | 40.9                   | 20.6                    | 14.8                 |
| 99                 | 141.7                  | 67.7                    | 15.7                 |

**Table S2** Overall output of studies submitted to the ESC 2006: Studies were followed for four years for publication and citation. Values refer to a random selection of ten percent (n=1002, margin of error 0.01) of all studies submitted (n=10,020). All studies submitted to the ESC in 2006 led to 2930±29 publications that yielded 32,160±322 total citations and an overall impact of 12.643±126.

**Table S3: Scientific output of the ESC 2006 by gender**

|                                       |                                  | <b>Male</b><br>[% total (n)] | <b>Female</b><br>[% total (n)] | <b>P-value</b><br>(Fisher's Exact) | <b>OR</b><br>(95% C.I.) |
|---------------------------------------|----------------------------------|------------------------------|--------------------------------|------------------------------------|-------------------------|
| <b>Acceptance at the ESC Congress</b> | <i>first author</i> <sup>†</sup> | 39.8% (288)                  | 33.7% (88)                     | 0.088                              | 0.768 (0.571-1.034)     |
|                                       | <i>last author</i> <sup>‡</sup>  | 38.2% (322)                  | 38.9% (51)                     | 0.923                              | 1.030 (0.706-1.052)     |
| <b>Publication</b>                    | <i>first author</i> <sup>†</sup> | 30.0% (217)                  | 27.2% (71)                     | 0.428                              | 0.877 (0.640-1.203)     |
|                                       | <i>last author</i> <sup>‡</sup>  | 30.8% (259)                  | 19.1% (25)                     | <b>0.004</b>                       | 0.505 (0.317-0.805)     |
| <b>≥ 10 2-year citations</b>          | <i>first author</i> <sup>†</sup> | 14.3% (31)                   | 18.3% (13)                     | 0.449                              | 1.338 (0.657-2.725)     |
|                                       | <i>last author</i> <sup>‡</sup>  | 16.6% (43)                   | 4.0% (1)                       | 0.143                              | 0.218 (0.029-1.661)     |

OR=odds ratio, C.I.=confidence interval, male authors served as reference for odds ratio calculation.  
 Random 10% selection (n=1002), representative for all abstracts submitted (n=10,020), margin of error<0.01.  
<sup>†</sup> In 18 studies no gender for the first author could be identified.  
<sup>‡</sup> In 29 studies no gender for the last author could be identified.

**Table S4: Comparison of variable distribution in the 10% random selection (n=1002) and the complete study sample (100% of cases, n=10 020)**

| Test variable          | Test group   | Ranks [n] | Mean rank | Sum of ranks | Man-Whitney U | Asymp. Sig.<br>(two-tailed) |
|------------------------|--------------|-----------|-----------|--------------|---------------|-----------------------------|
| <b>Av. rev. rating</b> | selected 10% | 1 002     | 5 544.06  | 5 555 151    | 4 987 392     | 0.734                       |
|                        | 100%         | 10 020    | 5 508.24  | 55 192 602   |               |                             |
| <b>Pres. format</b>    | selected 10% | 1 002     | 5 486.7   | 5 497 671    | 4 995 168     | 0.762                       |
|                        | 100%         | 10 020    | 5 513.98  | 55 250 082   |               |                             |
| <b>Topic</b>           | selected 10% | 1 002     | 5 541.64  | 5 552 721.5  | 4 989 818.5   | 0.752                       |
|                        | 100%         | 10 020    | 5 508.49  | 55 195 028.5 |               |                             |

To secure that the computer-assisted random selection of 10% of all cases was representative, the distributions of common test variables were compared. Average reviewer rating: 150 categories, presentation format: 3 categories, Topic: 27 categories. Asymptomatic significances are displayed. No significant differences were observed.

**Table S5:** Pilot assessment of agreement and intraclass correlation between the four reviewers

## A

| Test variable                             | n  | av. pairw. agreement [%] | rev. 1 vs. 4 | rev. 1 vs. 3 | rev. 1 vs. 2 | rev. 2 vs. 4 | rev. 2 vs. 3 | rev. 3 vs. 4 | Fleiss' kappa |
|-------------------------------------------|----|--------------------------|--------------|--------------|--------------|--------------|--------------|--------------|---------------|
| <i>Institutional affiliation</i>          | 30 | 96.697                   | 92.593       | 96.296       | 100.00       | 92.593       | 96.296       | 96.296       | 0.862         |
| <i>gender, first author</i>               | 30 | 96.296                   | 96.296       | 96.296       | 92.593       | 96.296       | 96.296       | 100.00       | 0.853         |
| <i>gender, last author</i>                | 30 | 98.148                   | 96.296       | 96.296       | 96.296       | 100.00       | 100.00       | 100.00       | 0.943         |
| <i>study design</i>                       | 30 | 93.872                   | 92.593       | 8.889        | 96.296       | 96.296       | 92.593       | 96.296       | 0.886         |
| <i>type of research (clin. vs. basic)</i> | 30 | 100.00                   | 100.00       | 100.00       | 100.00       | 100.00       | 100.00       | 100.00       | 1.000         |
| <i>publication status</i>                 | 30 | 100.00                   | 100.00       | 100.00       | 100.00       | 100.00       | 100.00       | 100.00       | 1.000         |

## B

| Test variable                        | n  | ICC (95% CI)        |
|--------------------------------------|----|---------------------|
| <i>If clinical, patient no.</i>      | 28 | 0.999 (0.996-0.999) |
| <i>If published, total citations</i> | 10 | 1.00 (1.00-1.00)    |
| <i>If published, 2y citations</i>    | 10 | 0.996 (0.990-0.999) |

In a pilot study a random sample of 30 abstracts (3% of the study sample) was independently assessed by each of the four reviewers. Agreement (categorical variables, A) and intraclass correlation (continuous variables, B) for all variables was assessed. av. pairw. agreement=average pairwise agreement, rev.=reviewer, clin.=clinical, ICC=intraclass correlation coefficient, CI=confidence interval, 2y= two year.

## References

1. Bartlett JE, Kotrlik JW, Higgins C, C. Organizational Research: Determining Appropriate Sample Size in Survey Research. *Information Technology, Learning, and Performance Journal*. 2001;**19**(1):43-50.
